# Supplementary material for: Association between 15 known or potential breast cancer susceptibility genes and breast cancer risks in Chinese women
Source: PubMed Central journal article supplement (PMC8832954; doi:10.20892/j.issn.2095-3941.2021.0358), 2021-10-12
Supplement: cbm-19-253-s001.pdf [file cbm-19-253-s001.pdf]

# Supplementary materials

**Table S1** The variants with conflicting interpretations of pathogenicity in ClinVar were further annotated according to the ACMG/AMP standards and guidelines

| AAChange.ref Gene                                    | ClinVar submission                                                                          | ClinVar class                                         | BRCA exchange class                             | BIC class                            | HGMD class   | HGMD phenotype                       | Publications                                                                                                                    | ACMG evidence summary    | ACMG conclusion      |
|------------------------------------------------------|---------------------------------------------------------------------------------------------|-------------------------------------------------------|-------------------------------------------------|--------------------------------------|--------------|--------------------------------------|---------------------------------------------------------------------------------------------------------------------------------|--------------------------|----------------------|
| ATM:<br>NM_000051.3:<br>c.6154G>A:<br>p.Glu2052Lys   | Pathogenic(2),<br>Likely pathogenic(3),<br>Uncertain significance(2)<br>Of<br>pathogenicity | Conflicting<br>Interpretations<br>Of<br>pathogenicity | -                                               | -                                    | DM           | Breast and/or<br>ovarian cancer      | PMID: 23946315,<br>PMID: 27616075,<br>PMID: 28492532,<br>PMID: 10330348,<br>PMID: 2572163,<br>PMID: 25741868,<br>PMID: 20301790 | PP5_strong,<br>PM2       | Likely<br>pathogenic |
| BRCA2:<br>NM_000059.3:<br>c.8350C>T:<br>p.Arg2784Trp | Likely pathogenic(4),<br>Uncertain significance(4)<br>Of<br>pathogenicity                   | Conflicting<br>Interpretations<br>Of<br>pathogenicity | Not Yet<br>Reviewed<br>Clinically<br>Importance | Clinically<br>Importance:<br>unknown | DM?          | Breast and/or<br>ovarian cancer      | PMID: 10923033;<br>PMID19043619;<br>PMID: 33471991;<br>PMID: 27616075;<br>PMID: 19200354;<br>PMID: 18451181                     | PM1+PM2+PS_<br>PP5_M     | Likely<br>pathogenic |
| RAD51D:<br>NM_002878.3:<br>c.620C>T:<br>p.Ser207Leu  | Likely pathogenic(7),<br>Uncertain significance(3)<br>Of<br>pathogenicity                   | Conflicting<br>Interpretations<br>Of<br>pathogenicity | -                                               | -                                    | DM           | Ovarian cancer                       | PMID: 22986143;<br>PMID: 26845104;<br>PMID: 33471991                                                                            | PM2+PP3+PS_PP5_M         | Likely<br>pathogenic |
| BRCA1:<br>NM_007294.3:<br>c.442-22_442-13del         | Pathogenic(1),<br>Likely pathogenic(1),<br>Uncertain significance(1)<br>Of<br>pathogenicity | Conflicting<br>Interpretations<br>Of<br>pathogenicity | Not Yet<br>Reviewed<br>Clinically<br>Importance | No record                            | No<br>record | No record                            | PMID: 33471991;<br>PMID: 31214711                                                                                               | PM2+PS_PP5_M             | Likely<br>pathogenic |
| RAD51C:<br>NM_058216.3:<br>c.934C>T:<br>p.Arg312Trp  | Likely pathogenic(2),<br>Uncertain significance(3)<br>Of<br>pathogenicity                   | Conflicting<br>Interpretations<br>Of<br>pathogenicity | -                                               | -                                    | DM           | Ovarian cancer                       | PMID: 22810696;<br>PMID: 28492532;<br>PMID: 28829762;<br>PMID: 25741868                                                         | PM2,PP5_<br>moderate,PP3 | Likely<br>pathogenic |
| BRIP1:<br>NM_032043.2:<br>c.751C>T:<br>p.Arg251Cys   | Likely pathogenic(2),<br>Uncertain significance(3)<br>Of<br>pathogenicity                   | Conflicting<br>Interpretations<br>Of<br>pathogenicity | -                                               | -                                    | DM           | Fanconi<br>anaemia/<br>Breast cancer | PMID: 23613520;<br>PMID: 31214711;<br>PMID: 33471991                                                                            | PM1+PM2+PP3+PS_<br>PP5_M | Likely<br>pathogenic |
| TP53:<br>NM_000546.5:<br>c.845G>A:<br>p.Arg282Gln    | Likely pathogenic(2),<br>Uncertain significance(5)<br>Of<br>pathogenicity                   | Conflicting<br>Interpretations<br>Of<br>pathogenicity | -                                               | -                                    | DM           | Neuroblastoma                        | PMID: 10864200;<br>PMID: 33471991                                                                                               | PM2+PP3+PS_PP5_M         | Likely<br>pathogenic |

| AAChange.ref Gene                         |                                                                       | ClinVar submission                                    |   | ClinVar class | BRCA exchange class | BIC class                   | HGMD class                                                                                                                                                                                                                                                                                                                                                                                                 | HGMD phenotype           | Publications         | ACMG evidence summary | ACMG conclusion |
|-------------------------------------------|-----------------------------------------------------------------------|-------------------------------------------------------|---|---------------|---------------------|-----------------------------|------------------------------------------------------------------------------------------------------------------------------------------------------------------------------------------------------------------------------------------------------------------------------------------------------------------------------------------------------------------------------------------------------------|--------------------------|----------------------|-----------------------|-----------------|
| TP53:                                     | Pathogenic(1),<br>Likely pathogenic(3),<br>Uncertain significance(5)  | Conflicting<br>Interpretations<br>Of<br>pathogenicity | - | -             | DM                  | Adrenocortical<br>carcinoma | PMID: 12826609;<br>PMID: 29979965;<br>PMID: 22170717;<br>PMID: 29958926;<br>PMID: 23200980                                                                                                                                                                                                                                                                                                                 | PS3+PM1+PS_PP5_<br>M+BS1 | Likely<br>pathogenic |                       |                 |
| CHEK2:                                    | Pathogenic(10),<br>Likely pathogenic(5),<br>Uncertain significance(1) | Conflicting<br>Interpretations<br>Of<br>pathogenicity | - | -             | DM                  | Breast cancer               | PMID: 25741868;<br>PMID: 26845104;<br>PMID: 22419737;<br>PMID: 15649950;<br>PMID: 16551709;<br>PMID: 16914568;<br>PMID: 18085035;<br>PMID: 18571837;<br>PMID: 27153395                                                                                                                                                                                                                                     | PS3+PM2+PS_PP5           | Pathogenic           |                       |                 |
| NM_007194.3:<br>c.1283C>T:<br>p.Ser428Phe | Likely pathogenic(4),<br>Uncertain significance(2)                    | Conflicting<br>Interpretations<br>Of<br>pathogenicity | - | -             | DM                  | Breast cancer               | PMID: 22419737;<br>PMID: 33471991                                                                                                                                                                                                                                                                                                                                                                          | PM1+PS_PP5               | Likely<br>pathogenic |                       |                 |
| CHEK2:                                    | Pathogenic(9),<br>Likely pathogenic(8),<br>Uncertain significance(3)  | Conflicting<br>Interpretations<br>Of<br>pathogenicity | - | -             | DM                  | Breast cancer               | PMID: 25741868;<br>PMID: 20729852;<br>PMID: 21514219;<br>PMID: 23946381;<br>PMID: 24728327;<br>PMID: 27424552;<br>PMID: 24244489;<br>PMID: 26510858;<br>PMID: 27392074;<br>PMID: 24599715;<br>PMID: 27230571;<br>PMID: 26264438;<br>PMID: 27747004;<br>PMID: 26845104<br>PMID: 27438779;<br>PMID: 24880342;<br>PMID: 27632928;<br>PMID: 10617473;<br>PMID: 12533788;<br>PMID: 15239132;<br>PMID: 15492928; | PS3+PM1+PS_PP5_<br>M+BS1 | Likely<br>pathogenic |                       |                 |

Table S1 Continued

**Table S1** Continued

| AAChange.ref Gene | ClinVar submission | ClinVar class | BRCA exchange class | BIC class | HGMD class | HGMD phenotype | Publications                                                                                                                                                                                                 | ACMG evidence summary | ACMG conclusion |
|-------------------|--------------------|---------------|---------------------|-----------|------------|----------------|--------------------------------------------------------------------------------------------------------------------------------------------------------------------------------------------------------------|-----------------------|-----------------|
|                   |                    |               |                     |           |            |                | PMID: 16816021;<br>PMID: 17085682;<br>PMID: 17517688;<br>PMID: 19442246;<br>PMID: 21244692;<br>PMID: 19492346;<br>PMID: 27696107;<br>PMID: 25798211;<br>PMID: 27711073;<br>PMID: 16671833;<br>PMID: 21504591 |                       |                 |

BIC, Breast Cancer Information Core; HGMD, Human Gene Mutation Database; DM, disease causing mutation; ACMG/AMP, The American College of Medical Genetics and Genomics and the Association for Molecular Pathology.

**Table S2** The percentages of variants in this study reported in the ClinVar database

|               | No. of variants identified from cases and controls | No. of variants in ClinVar* (%) | No. of variants out ClinVar* (%) |
|---------------|----------------------------------------------------|---------------------------------|----------------------------------|
| <i>BRCA2</i>  | 197                                                | 148 (75.1%)                     | 49 (24.9%)                       |
| <i>BRCA1</i>  | 97                                                 | 81 (83.5%)                      | 16 (16.5%)                       |
| <i>PALB2</i>  | 55                                                 | 32 (58.2%)                      | 23 (41.8%)                       |
| <i>ATM</i>    | 44                                                 | 28 (63.3%)                      | 16 (36.4%)                       |
| <i>TP53</i>   | 25                                                 | 20 (80.0%)                      | 5 (20.0%)                        |
| <i>CHEK2</i>  | 28                                                 | 20 (71.4%)                      | 8 (28.6%)                        |
| <i>BARD1</i>  | 14                                                 | 9 (64.3%)                       | 5 (35.7%)                        |
| <i>RAD50</i>  | 16                                                 | 11 (68.8%)                      | 5 (31.3%)                        |
| <i>BRIP1</i>  | 22                                                 | 14 (63.6%)                      | 8 (36.4%)                        |
| <i>RAD51D</i> | 11                                                 | 6 (54.5%)                       | 5 (45.5%)                        |
| <i>PTEN</i>   | 4                                                  | 3 (75.0%)                       | 1 (25.0%)                        |
| <i>NBN</i>    | 9                                                  | 4 (44.4%)                       | 5 (55.6%)                        |
| <i>RAD51C</i> | 8                                                  | 7 (87.5%)                       | 1 (12.5%)                        |
| <i>CDH1</i>   | 1                                                  | 0 (0.0%)                        | 1 (100.0%)                       |
| <i>STK11</i>  | 2                                                  | 2 (100.0%)                      | 0 (0.0%)                         |
| In total      | 533                                                | 385 (72.2%)                     | 148 (27.8%)                      |

\*Compared with the ClinVar dataset, version 20210501.

**Table S3** Breast cancer risks of susceptibility genes estimated by case-control association analysis and adjusted for age in Chinese women

| Gene          | Case ( <i>n</i> = 8,067) |       | Control ( <i>n</i> = 13,129) |       | Adjusted OR<br>(95% CI) | Adjusted<br><i>P</i> -value |
|---------------|--------------------------|-------|------------------------------|-------|-------------------------|-----------------------------|
|               | No. of carriers          | %     | No. of carriers              | %     |                         |                             |
| <i>TP53</i>   | 31                       | 0.38% | 3                            | 0.02% | 56.6 (16.1–198.4)       | $2.86 \times 10^{-10}$      |
| <i>BRCA1</i>  | 146                      | 1.81% | 25                           | 0.19% | 14.6 (8.9–23.7)         | $6.32 \times 10^{-27}$      |
| <i>BRCA2</i>  | 284                      | 3.52% | 46                           | 0.35% | 14.1 (9.7–20.4)         | $9.02 \times 10^{-45}$      |
| <i>PALB2</i>  | 57                       | 0.71% | 18                           | 0.14% | 5.5 (3.0–10.0)          | $2.73 \times 10^{-8}$       |
| <i>ATM</i>    | 31                       | 0.38% | 24                           | 0.18% | 4.3 (2.0–9.2)           | $1.76 \times 10^{-4}$       |
| <i>BARD1</i>  | 15                       | 0.19% | 8                            | 0.06% | 3.5 (1.1–10.8)          | 0.03                        |
| <i>CHEK2</i>  | 26                       | 0.32% | 17                           | 0.13% | 3.2 (1.4–7.2)           | $5.07 \times 10^{-3}$       |
| <i>RAD51D</i> | 31                       | 0.38% | 23                           | 0.18% | 2.4 (1.2–4.7)           | $9.34 \times 10^{-3}$       |
| <i>PTEN</i>   | 5                        | 0.06% | 0                            | 0.00% | –                       | –                           |
| <i>CDH1</i>   | 1                        | 0.01% | 0                            | 0.00% | –                       | –                           |
| <i>STK11</i>  | 1                        | 0.01% | 1                            | 0.01% | 1.3 (0.1–20.5)          | 0.86                        |
| <i>NBN</i>    | 6                        | 0.07% | 5                            | 0.04% | 2.5 (0.6–10.0)          | 0.19                        |
| <i>RAD50</i>  | 21                       | 0.26% | 31                           | 0.24% | 1.5 (0.7–2.9)           | 0.28                        |
| <i>BRIP1</i>  | 11                       | 0.14% | 29                           | 0.22% | 0.6 (0.3–1.2)           | 0.15                        |
| <i>RAD51C</i> | 2                        | 0.02% | 22                           | 0.17% | 0.2 (0.0–0.8)           | 0.02                        |
| In total      | 654 <sup>#</sup>         | 8.11% | 251 <sup>#</sup>             | 1.91% | –                       | –                           |

<sup>#</sup>Fourteen breast cancer patients and 1 cancer-free control carrying pathogenic variants in 2 different genes. OR, odds ratio; CI, confidence interval. OR and *P* values were estimated by logistic regression.

**Table S4** Estimated breast cancer risks of susceptibility genes based on pathogenic truncating variants

| Gene          | Case ( <i>n</i> = 8,067) |       | Control ( <i>n</i> = 13,129) |       | OR (95% CI)     | <i>P</i>               |
|---------------|--------------------------|-------|------------------------------|-------|-----------------|------------------------|
|               | No. of carriers          | %     | No. of carriers              | %     |                 |                        |
| <i>TP53</i>   | 4                        | 0.05% | 0                            | 0.00% | –               | –                      |
| <i>BRCA1</i>  | 263                      | 3.26% | 38                           | 0.29% | 11.6 (8.3–16.3) | $1.77 \times 10^{-70}$ |
| <i>BRCA2</i>  | 136                      | 1.69% | 18                           | 0.14% | 12.5 (7.6–20.4) | $5.06 \times 10^{-38}$ |
| <i>PALB2</i>  | 57                       | 0.71% | 16                           | 0.12% | 5.8 (3.3–10.2)  | $1.72 \times 10^{-12}$ |
| <i>ATM</i>    | 15                       | 0.19% | 8                            | 0.06% | 3.1 (0.3–7.2)   | 0.007                  |
| <i>BARD1</i>  | 24                       | 0.30% | 9                            | 0.07% | 4.4 (2.0–9.4)   | $4.00 \times 10^{-5}$  |
| <i>CHEK2</i>  | 31                       | 0.38% | 22                           | 0.17% | 2.3 (1.3–4.0)   | 0.002                  |
| <i>RAD51D</i> | 28                       | 0.35% | 20                           | 0.15% | 2.3 (1.3–4.1)   | 0.004                  |
| <i>PTEN</i>   | 5                        | 0.06% | 0                            | 0.00% | –               | –                      |
| <i>CDH1</i>   | 1                        | 0.01% | 0                            | 0.00% | –               | –                      |
| <i>STK11</i>  | 1                        | 0.01% | 1                            | 0.01% | 1.6 (0.1–26.0)  | 1.00                   |
| <i>NBN</i>    | 6                        | 0.07% | 4                            | 0.03% | 2.4 (0.7–8.7)   | 0.27                   |
| <i>RAD50</i>  | 21                       | 0.26% | 30                           | 0.23% | 1.1 (0.7–2.0)   | 0.65                   |
| <i>BRIP1</i>  | 10                       | 0.12% | 27                           | 0.21% | 0.6 (0.3–1.2)   | 0.17                   |
| <i>RAD51C</i> | 1                        | 0.01% | 16                           | 0.12% | 0.1 (0.01–0.8)  | 0.006                  |
| In total      | 593 <sup>#</sup>         | 7.35% | 208 <sup>#</sup>             | 1.58% | –               | –                      |

<sup>#</sup>Ten breast cancer patients and 1 cancer-free control carrying pathogenic variants in 2 different genes. OR, odds ratio; CI, confidence interval. OR and *P* values were estimated using logistic regression.
